## RESEARCH ARTICLE

# Amazon river dolphins (*Inia geoffrensis*) use a high-frequency short-range biosonar

Michael Ladegaard<sup>1,\*</sup>, Frants Havmand Jensen<sup>2,3</sup>, Mafalda de Freitas<sup>1</sup>, Vera Maria Ferreira da Silva<sup>4</sup> and Peter Teglberg Madsen<sup>1,5</sup>

## ABSTRACT

Toothed whales produce echolocation clicks with source parameters related to body size; however, it may be equally important to consider the influence of habitat, as suggested by studies on echolocating bats. A few toothed whale species have fully adapted to river systems, where sonar operation is likely to result in higher clutter and reverberation levels than those experienced by most toothed whales at sea because of the shallow water and dense vegetation. To test the hypothesis that habitat shapes the evolution of toothed whale biosonar parameters by promoting simpler auditory scenes to interpret in acoustically complex habitats, echolocation clicks of wild Amazon river dolphins were recorded using a vertical seven-hydrophone array. We identified 404 on-axis biosonar clicks having a mean  $SL_{pp}$  of  $190.3 \pm 6.1$  dB re.  $1 \mu\text{Pa}$ , mean  $SL_{EFD}$  of  $132.1 \pm 6.0$  dB re.  $1 \mu\text{Pa}^2\text{s}$ , mean  $F_c$  of  $101.2 \pm 10.5$  kHz, mean  $BW_{RMS}$  of  $29.3 \pm 4.3$  kHz and mean ICI of  $35.1 \pm 17.9$  ms. Piston fit modelling resulted in an estimated half-power beamwidth of  $10.2$  deg (95% CI:  $9.6$ – $10.5$  deg) and directivity index of  $25.2$  dB (95% CI:  $24.9$ – $25.7$  dB). These results support the hypothesis that river-dwelling toothed whales operate their biosonars at lower amplitude and higher sampling rates than similar-sized marine species without sacrificing high directivity, in order to provide high update rates in acoustically complex habitats and simplify auditory scenes through reduced clutter and reverberation levels. We conclude that habitat, along with body size, is an important evolutionary driver of source parameters in toothed whale biosonars.

**KEY WORDS:** Beamwidth, Clutter, Directionality, Echolocation, Habitat, Toothed whale

## INTRODUCTION

Echolocation is an active sense that involves generation and transmission of high-intensity sound pulses into the environment, and subsequent auditory detection and processing of returning echoes to inform changes in motor patterns for navigation and foraging (Griffin, 1958). The ability to detect echoes is ultimately limited by the hearing threshold, but for most healthy animals, the threshold for echo detection is set by either the ambient background noise or the level of reverberation or clutter (Au and Turl, 1983; Turl

et al., 1991). In a noise-limited scenario, the detection range can be increased by increasing the biosonar source level (SL). However, this is not true for a reverberation- or clutter-limited scenario. Reverberation and clutter consist of unwanted echoes reflected off objects in the medium and from the boundaries, thus the level of reverberation and clutter will be proportional to the outgoing SL (Au, 1992). To increase detection range, an animal might then increase the transmitting directivity to reduce the number of ensonified objects in the same delay window as the target of interest (Moss and Surlykke, 2001; Aytekin et al., 2010). Thus, the optimal SL and directivity of animal biosonars are likely to be influenced by the habitat and the behavioural context in which the biosonars are operated. This has been demonstrated for bats (Neuweiler, 1989; Schnitzler and Kalko, 2001; Surlykke et al., 2009), yet little is known about how different habitats might drive evolution and operation of biosonars in toothed whales.

Previous studies have shown that large oceanic toothed whales emit low-frequency clicks at high SLs and with long interclick intervals (ICIs), allowing for long-range target detection (Møhl et al., 2003; Zimmer et al., 2005). Smaller coastal species, by contrast, emit high-frequency clicks at lower SL and short ICIs, resulting in short-range biosonars that allow high update rates on the acoustic environment (Madsen and Surlykke, 2013). The low-frequency echolocation clicks of large toothed whales in comparison to those produced by smaller species also suggest an inverse scaling of frequency with body size. As biosonar directivity is determined by signal frequency relative to size of the emitting aperture, such inverse scaling has led to fairly similar biosonar directivity amongst toothed whales (Koblitz et al., 2012), pointing to directivity as a potential evolutionary pressure determining biosonar frequency. Thus, to separate the effects of scaling from potential effects of habitat on click source parameters it is necessary to constrain analysis to species within a restricted size range.

To this effect, the paraphyletic group of extant river dolphins represent an ideal group of study subjects. The intriguing convergent evolution, where distantly related toothed whales have independently adapted to life in riverine environments (Hamilton et al., 2001) and acquired the same overall morphology, which is different to that of similar-sized marine toothed whales, raises the question of whether the various marine to freshwater transitions have also led to biosonar systems better suited for dealing with clutter. Theoretically, the best way a river dolphin can deal with clutter is by a downregulation of SL in conjunction with an ability to increase directivity, thus reducing detection range and decreasing beamwidth. However, an intricate relationship exists among SL, directivity and frequency (Moore and Pawloski, 1990; Au et al., 1995; Madsen et al., 2013a), so adjustments of one parameter are likely to affect the others. Depending on which parameters, or combinations thereof, are selected for over time, more than one evolutionary outcome may be possible for a clutter-adapted biosonar.

<sup>1</sup>Zoophysiology, Department of Bioscience, Aarhus University, Aarhus 8000, Denmark. <sup>2</sup>Department of Ecology and Evolutionary Biology, Princeton University, Princeton, NJ 08544, USA. <sup>3</sup>Biology Department, Woods Hole Oceanographic Institution, Woods Hole, MA 02543, USA. <sup>4</sup>Laboratório de Mamíferos Aquáticos, Instituto Nacional de Pesquisas da Amazônia, Manaus, AM 69000-000, Brazil. <sup>5</sup>Murdoch University Cetacean Research Unit, School of Veterinary and Life Sciences, Murdoch University, South Street, Murdoch, Western Australia 6150, Australia.

\*Author for correspondence (michael.ladegaard@bios.au.dk)

**List of symbols and abbreviations**

|           |                            |
|-----------|----------------------------|
| BW        | bandwidth                  |
| DI        | directivity index          |
| EFD       | energy flux density        |
| EPR       | equivalent piston radius   |
| $F_c$     | centroid frequency         |
| $F_p$     | peak frequency             |
| FFT       | fast Fourier transform     |
| ICI       | interclick interval        |
| pp        | peak to peak               |
| $Q_{RMS}$ | $F_c$ to $BW_{RMS}$ ratio  |
| RMS       | root mean squared          |
| SL        | source level               |
| TOL       | third octave level         |
| TOAD      | time-of-arrival difference |
| TWTT      | two-way travel time        |

The Amazon river dolphins, commonly known as botos (*Inia sp.*), are regularly found in shallow river channels, and seasonally, even in flooded forests (Best and da Silva, 1989; Martin and da Silva, 2004), suggesting that they, at least at times, operate their biosonars in highly clutter-limited conditions. Botos are therefore intriguing animals to study through quantification of click source parameters, since they may help shed light on the evolutionary driving forces behind biosonar parameters in different toothed whale species. To date, botos have been subject to multiple studies, including a few in the wild, but discrepancies exist in reported signal frequencies of boto echolocation clicks (Norris et al., 1972; Nakasai and Takemura, 1975; Kamminga et al., 1993) and source parameters such as SL and directivity index (DI) are lacking from the published literature on free-ranging animals.

Given their habitat, we hypothesise that botos use a short-range biosonar with high directivity. Specifically, we further hypothesise that botos will produce clicks at lower SL and operate their biosonars at shorter ICIs compared with similar-sized marine species. This would simplify the auditory scene through a decreased sensory volume, and provide high update rates, which we hypothesise are important when navigating a complex habitat. However, clicking at low SL has been shown to decrease the peak ( $F_p$ ) and centroid frequency ( $F_c$ ) of emitted clicks, thus lowering the DI (Houser et al., 2005; Madsen et al., 2013a). A low DI will provide more clutter, thus complicating echo processing. We therefore additionally hypothesise that botos will produce clicks with high  $F_c$  relative to SL in order to keep their biosonar beams directional.

Here, we test these hypotheses by using a vertical seven-hydrophone array to quantify source parameters of echolocation clicks of wild botos (*Inia geoffrensis* Blainville 1817) in three different areas in the Amazon, Brazil. We show that botos operate a short-range biosonar system with source parameters that cannot be predicted simply from size-related scaling. Specifically, we show that in comparison with similar-sized marine toothed whales, the boto clicks at high rates, producing low SL clicks with high-frequency content, whereas beam directivity compares with that of other toothed whales, regardless of size.

**RESULTS****Recordings**

Botos were recorded in three main areas containing black water, white water or a mixture. Botos were found as single animals,

**Table 1. Source parameters for all boto echolocation clicks recorded on-axis**

|                     | Mean $\pm$ s.d.  | Range (min–max) | Units                            |
|---------------------|------------------|-----------------|----------------------------------|
| SL <sub>pp</sub>    | 190.3 $\pm$ 6.1  | 167–209         | dB re. 1 $\mu$ Pa                |
| SL <sub>RMS</sub> * | 180.7 $\pm$ 6.2  | 156–198         | dB re. 1 $\mu$ Pa                |
| SL <sub>EFD</sub> * | 132.1 $\pm$ 6.0  | 108–150         | dB re. 1 $\mu$ Pa <sup>2</sup> s |
| Duration*           | 14.1 $\pm$ 3.1   | 9–29            | $\mu$ s                          |
| $F_c$               | 101.2 $\pm$ 10.5 | 61–138          | kHz                              |
| $F_p$               | 95.7 $\pm$ 12.4  | 55–158          | kHz                              |
| BW <sub>-3dB</sub>  | 50.4 $\pm$ 17.1  | 32–118          | kHz                              |
| BW <sub>-10dB</sub> | 117.5 $\pm$ 19.9 | 68–175          | kHz                              |
| BW <sub>RMS</sub>   | 29.3 $\pm$ 4.3   | 19–41           | kHz                              |
| $Q_{RMS}$           | 3.5 $\pm$ 0.5    | 2.1–5.4         |                                  |
| ICI                 | 35.1 $\pm$ 17.9  | 8–126           | ms                               |
| Range               | 16.2 $\pm$ 10.8  | 1–40            | m                                |
| N                   | 404              |                 |                                  |

\*Calculated between the –10 dB end points relative to the peak of the amplitude envelope.

mother calf pairs and in small groups of usually less than five animals. In general, animals were in a state of feeding/milling behaviour, where they moved around slowly in the same area. Recordings from all three areas totalled 213 min of usable recordings containing 34,827 echolocation clicks with received levels above a threshold set for the initial screening process. Within the confident localisation range of 40 m, a total of 404 echolocation clicks fulfilled the on-axis criteria. Of those clicks, 268 were within the 21 m requirement for inclusion in piston fit modelling.

**Source parameters**

Boto clicks were broadband transients having a mean duration of 14.1 $\pm$ 3.1  $\mu$ s with a mean ICI of 35.1 $\pm$ 17.9 (Table 1). An example click is given in Fig. 1A,B with its waveform and power spectrum shown. Power spectra for all 404 on-axis clicks are shown in Fig. 1C with mean energy distribution overlaid. The clicks had a mean  $F_p$  of 95.7 $\pm$ 12.4 kHz. Energy was centred on a mean  $F_c$  of 101.2 $\pm$ 10.5 kHz with root-mean-squared bandwidth ( $BW_{RMS}$ ) of 29.3 $\pm$ 4.3 kHz resulting in a  $Q_{RMS}$  ratio of 3.5 $\pm$ 0.5 (Table 1). Linear regression analysis revealed a significant positive relationship for the slope of  $F_p$  as a function of  $F_c$  (Fig. 2A;  $R^2=0.48$ ,  $t$ -test,  $P<0.001$ ) with  $F_p=0.82F_c+12.9$  kHz and also between  $F_c$  and  $BW_{RMS}$  (Fig. 2B;  $R^2=0.25$ ,  $t$ -test,  $P<0.001$ ) with  $F_c=1.2BW_{RMS}+65.0$  kHz. A significant positive relationship was also found between  $F_c$  and SL<sub>pp</sub> (Fig. 2B;  $R^2=0.11$ ,  $t$ -test,  $P<0.001$ ) with  $F_c=0.56SL_{pp}-4.5$  kHz. The lowest SL<sub>pp</sub> values were measured at distances less than 5 m from the recording array (Fig. 3A). A significant positive relationship was found between SL<sub>pp</sub> and log(range) (Fig. 2B;  $R^2=0.47$ ,  $t$ -test,  $P<0.001$ ) where  $SL_{pp}=12.4 \log(\text{range})+176.7$  dB re. 1  $\mu$ Pa (Fig. 3A). A few on-axis clicks came close to the clip level of the recording array represented by the upper dashed line in Fig. 3A, but no clicks were found to have been clipped. On-axis clicks were mostly well above the selected threshold of the initial screening process of 154 dB re. 1  $\mu$ Pa (peak) represented by the lower dashed line in Fig. 3A. The relationship between ICI and range was also positive (Fig. 3B;  $R^2=0.15$ ,  $t$ -test,  $P<0.001$ ) with the corresponding linear regression line  $ICI=0.65\text{range}+24.5$  ms (Fig. 3B). To estimate effects of pseudo-replication caused by multiple measurements on the same animals, we adjusted the degrees of freedom and found that all relationships were significant ( $P<0.05$ ) if at least four animals had been measured (under the assumption of an identical number of clicks performed by each animal).

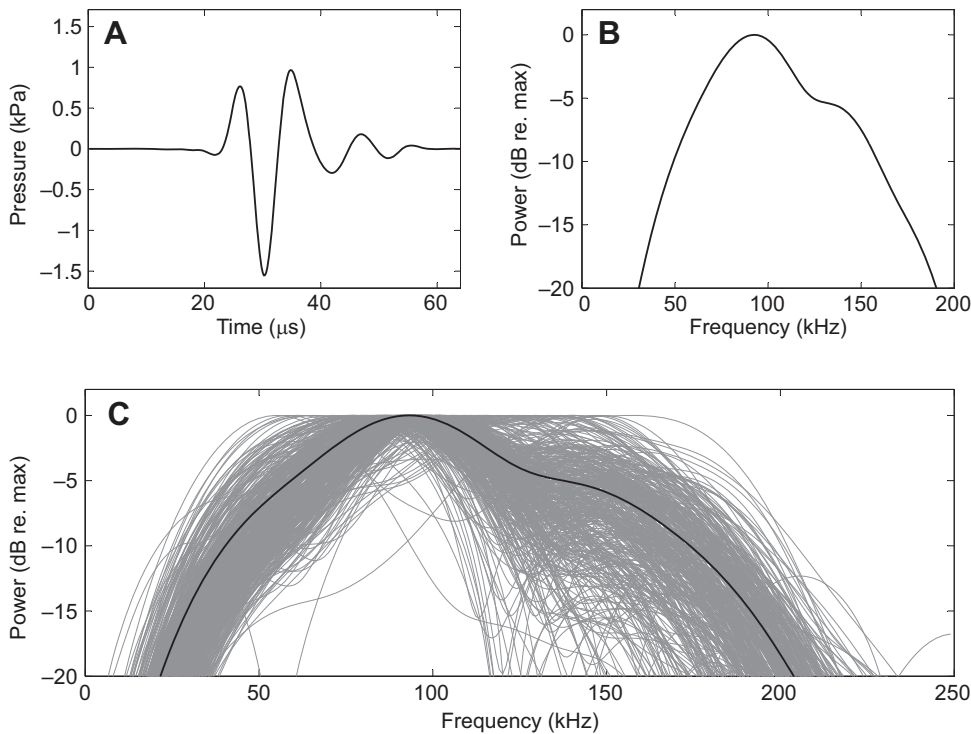

**Fig. 1. Representative Amazon river dolphin echolocation click recorded on-axis with mean energy distribution for all on-axis clicks.** (A) Waveform showing absolute pressure fluctuations after correction for transmission loss to estimate source level values at a reference distance of 1 m. The signal has been interpolated ten times. (B) Power spectrum of the same click as in A with energy normalised relative to the peak frequency. (C) Power spectra of all 404 on-axis clicks (grey) along with their mean energy distribution (black). The energy content has been normalised for each click relative to individual peak frequencies. The FFT size used to calculate all power spectra is 512.

When comparing on-axis clicks between recording areas, several of the parameters listed in Table 1 turned out to differ significantly (two-sample *t*-test,  $P < 0.05$ ). The mean  $SL_{pp}$ ,  $SL_{RMS}$ ,  $SL_{EFD}$ ,  $F_c$ ,  $F_p$  and  $Q_{RMS}$  differed between São Tomé (103 clicks) and Mamirauá Sustainable Development Reserve (193 clicks) and when comparing São Tomé with the confluence of Rio Negro and Rio Solimões (108 clicks) where significant differences were also found for mean ICI. Comparing clicks from the confluence and Mamirauá

Sustainable Development Reserve the differences in mean ICI and localisation range were significant. The mean value differences were  $< 3$  dB for  $SL_{pp}$ ,  $SL_{RMS}$  and  $SL_{EFD}$ ,  $< 5$  kHz for  $F_c$  and  $F_p$ ,  $< 0.15$  for  $Q_{RMS}$ ,  $< 6$  ms for ICI and  $< 3$  m for localisation range. Albeit significant, potentially due to large sample sizes, the differences are so small that hypotheses about local habitat adaptations in biosonar parameters seem unsupported with the available data sets.

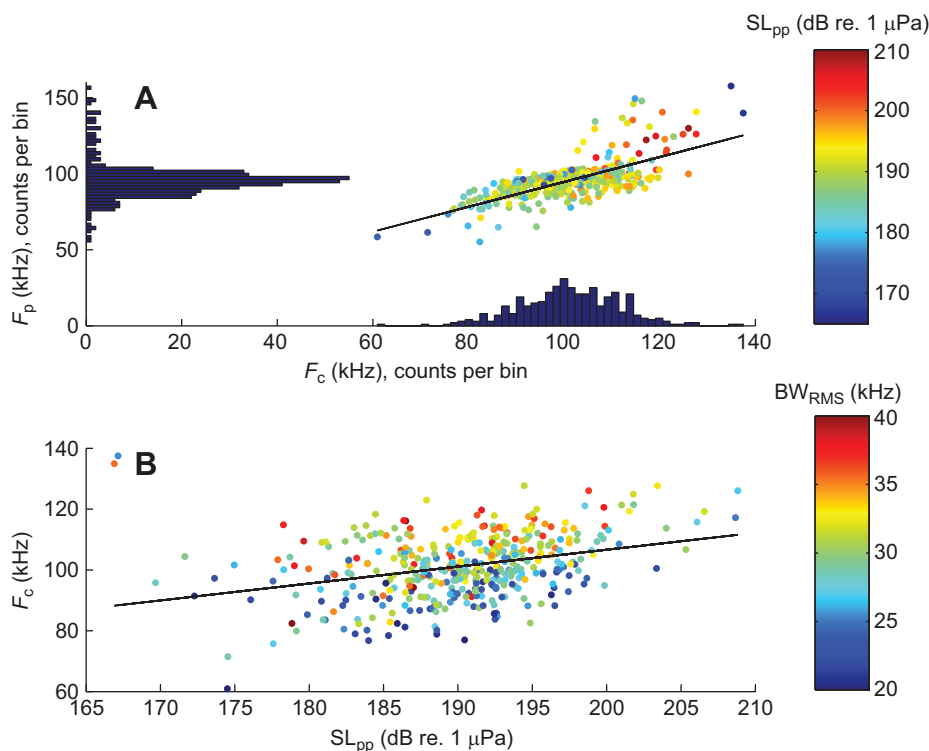

**Fig. 2. Frequency and source level analysis of Amazon river dolphin echolocation clicks.** (A) Peak frequency ( $F_p$ ) as a function of centroid frequency ( $F_c$ ). Data points have been colour coded with respect to source level ( $SL_{pp}$ ) relative to the scale bar on the right. Histograms on the x- and y-axis show counts of data points of  $F_c$  and  $F_p$ , respectively, with data points being divided into 50 bins along the data range for all 404 on-axis clicks localised to less than 40 m. The solid black line is the linear regression line ( $F_p = 0.82F_c + 12.9$ ;  $R^2 = 0.48$ ). (B)  $F_c$  as a function of  $SL_{pp}$ . Data points have been colour coded with respect to root-mean-squared bandwidth ( $BW_{RMS}$ ). The solid black line is the linear regression line ( $F_c = 0.56SL_{pp} - 4.5$ ;  $R^2 = 0.11$ ).

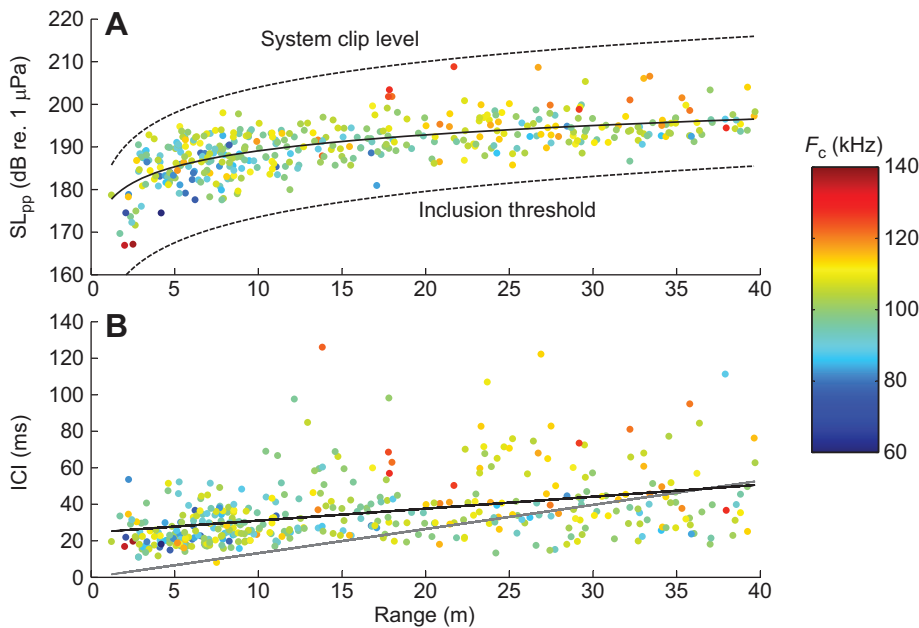

**Fig. 3. Source level and interclick interval as a function of localisation range.** (A) SL<sub>pp</sub> as a function of range. The upper dashed line represents SL<sub>pp</sub> required to reach the clip level of the recording chain (184 dB re. 1 µPa) as a function of range. The lower dashed line represents the SL<sub>pp</sub> boundary for when recordings were included in the analysis based on the received level criteria of 154 dB re. µPa (peak). The solid black line is the linear regression line (SL<sub>pp</sub>=12.4log(range)+176.7; R<sup>2</sup>=0.47) calculated after log-transformation of range. (B) ICI as a function of range. Each data point represents the duration between an on-axis click and the previous click in a scan. A linear regression line (ICI=0.65range+24.5; R<sup>2</sup>=0.17) is plotted as a solid black line. The two-way travel time (TWTT) is plotted as a solid grey line. The ICIs shorter than the TWTT at ranges >17 m indicate that the bots were not locked on to the recording array, but focused on something closer to them.

### Beam pattern

The vertical composite beam pattern yielding the best piston fit for all on-axis clicks acoustically localised to less than 21 m resulted in a symmetric half-power (−3 dB) beamwidth of 10.2 deg with 95% bootstrap confidence interval (BCI) from 9.6–10.5 deg and corresponding DI of 25.2 dB with 95% BCI from 24.9–25.7 dB (Fig. 4, Table 2). The best piston fit was found for all clicks when fitting with an equivalent piston radius (EPR) of 3.6 cm (Table 2). Fig. 5B presents a click example where the signals recorded by each of the seven hydrophones have been back-calculated to a reference distance of 1 m. From this example, it is seen that amplitudes decrease with increasing off-axis angles in concert with distortions of the waveforms relative to the signal recorded closest to the acoustic axis. Surprisingly, the signal recorded on the second lowest

hydrophone is smaller in amplitude and energy relative to the signal recorded on the lowest hydrophone. This phenomenon was seen for several clicks both above and below the 21 m localisation range criterion for inclusion in the piston fit model. Since this was an unexpected finding and violates one of the assumptions in the piston fit procedure, the clicks localised to less than 21 m were divided into two groups for which the piston model was run separately (Table 2). One group contained only clicks with single-lobed beam patterns and a second group contained only clicks with double-lobed beam patterns. To allow for some error of measurements, clicks were characterised as having a double-lobed beam pattern if the recorded amplitude increased from one hydrophone to the next by >3 dB when moving away from the estimated acoustic axis. Separate analysis (not shown) of source parameters for on-axis clicks excluding those having double-lobed beam patterns revealed almost no difference from the source parameters presented in Table 1. Clicks with double-lobed beam patterns had broader mean half-power beamwidth and lower DI than single-lobed clicks (Table 2). For the group with the expected single-lobed beam patterns, the piston fit modelling was also done after these data had been divided into seven bins based on localisation range. A tendency for range dependence was evident with clicks localised at very short ranges (0–3 m), with significantly broader composite beamwidth (Fig. 5A) and smaller DI compared with clicks recorded at longer range (Table 2).

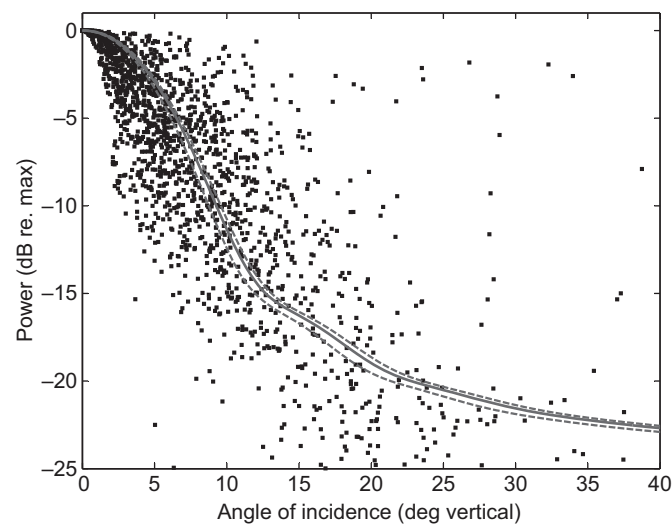

**Fig. 4. Power as a function of angle of incidence together with one-sided beam pattern.** Beam pattern (grey solid line) estimated by piston modelling to best fit all data combined for the 268 on-axis clicks along with the estimated beam pattern's 95% confidence interval (grey dashed line) derived by bootstrapping procedure. For each click, a total of seven signals contribute with a data point (black squares).

### Ambient noise levels

The spectrogram of the noise recording from the river channel in Mamirauá Sustainable Development Reserve (Fig. 6A) illustrates the noise levels that bots may be exposed to on a daily basis in that general area. Small motorised boats were occasionally observed in the river channel, but the main noise contribution is likely to be biological in origin, such as the noticeable noise band around 8 kHz. The 8 kHz noise band is most pronounced during the 6 h following sunset, whereas general noise levels seem clearly elevated in the 2 h following sunset (Fig. 6A). Third octave levels (TOL) differed between the two noise recording sites (Fig. 6B) with the São Tomé recording showing almost constant TOLs at about 90 dB re. 1 µPa regardless of frequency, whereas the Mamirauá recording showed



**Table 2. Beam patterns determined by piston fit modelling**

|        | Localisation range (m) | Mean EPR (95% CI; cm) | Mean symmetric half-power beamwidth (95% CI; deg) | Mean DI (95% CI; dB) | N   |
|--------|------------------------|-----------------------|---------------------------------------------------|----------------------|-----|
| All    | 0–21                   | 3.6 (3.5–3.8)         | 10.2 (9.6–10.5)                                   | 25.2 (24.9–25.7)     | 268 |
| Single | 0–21                   | 4.2 (3.9–4.4)         | 9.4 (9.0–10.0)                                    | 25.9 (25.3–26.3)     | 236 |
| Double | 0–21                   | 3.5 (2.9–4.1)         | 10.5 (8.9–12.9)                                   | 24.9 (23.1–26.3)     | 32  |
| Single | 0–3                    | 2.7 (1.8–3.5)         | 14.6 (11.2–22.3)                                  | 22.1 (18.4–24.4)     | 14  |
| Single | 3–6                    | 4.2 (3.9–4.5)         | 9.4 (8.7–10.2)                                    | 25.9 (25.2–26.6)     | 58  |
| Single | 6–9                    | 4.2 (3.9–4.5)         | 9.4 (8.8–10.0)                                    | 25.9 (25.3–26.4)     | 68  |
| Single | 9–12                   | 4.4 (3.7–4.8)         | 9.0 (8.1–10.6)                                    | 26.3 (24.8–27.2)     | 33  |
| Single | 12–15                  | 4.4 (3.8–5.2)         | 8.9 (7.6–10.5)                                    | 26.4 (25.0–27.7)     | 23  |
| Single | 15–18                  | 4.5 (3.9–5.6)         | 8.8 (7.0–10.1)                                    | 26.5 (25.2–28.5)     | 25  |
| Single | 18–21                  | 4.8 (4.2–5.5)         | 8.1 (7.0–9.3)                                     | 27.2 (26.0–28.4)     | 15  |

Modelling was done with all on-axis clicks localised to less than 21 m (all) or with clicks being divided into two groups: clicks with single-lobed beams (single) and clicks with double-lobed beam patterns (double). Clicks categorised as having single-beam patterns were additionally analysed in 3 m bins.

an overall trend of decreasing TOLs towards higher frequencies. Above a few hundred Hz, both noise recordings from this study had lower TOLs compared with a coastal noise recording made in tropical waters with snapping shrimp present (Fig. 6B).

## DISCUSSION

Parameters of toothed whale echolocation clicks have been shown to scale with animal size (Au, 1993; Madsen and Surlykke, 2013), except for DI which seems relatively constant across toothed whale species (Koblitz et al., 2012; Madsen and Surlykke, 2014). Scaling should therefore be considered when making interspecies comparisons of source parameters. Botos are comparable in size to marine species such as pantropical spotted dolphins (*Stenella attenuata*), spinner dolphins (*S. longirostris*), Indo-Pacific bottlenose dolphins (*Tursiops aduncus*) and some ecotypes of common bottlenose dolphins (*T. truncatus*) (Jefferson et al., 2008), which all make broadband echolocation clicks like botos and for which source parameters have been reported in the wild (Schotten et al., 2004; Wahlberg et al., 2011). By hypothesising that scaling is

the major driver of source parameters, then botos are expected to emit clicks similar to those of the four marine species. Alternatively, it opens up a second hypothesis where habitat is an important co-driver acting on biosonar source parameters (Jensen et al., 2013), thus making it more likely that converging source parameters are found for similar-sized species that live in acoustically similar habitats, such as rivers. In this study, we present data in favour of the second hypothesis and discuss how clutter and reverberation in rivers are likely to be major factors responsible for the lower SL and faster clicking rate at high  $F_c$  and DI of river dolphins compared with marine species.

## Fast biosonar sampling rates

Toothed whales generally do not produce a new click until relevant echoes from the previous click are received to avoid range ambiguity problems, so the two-way travel time (TWTT) corresponding to the ICI is expected to represent an upper estimate of range to targets of interest (Au et al., 1974; Au, 1993; Akamatsu et al., 1998). The ICI can be divided into TWTT to

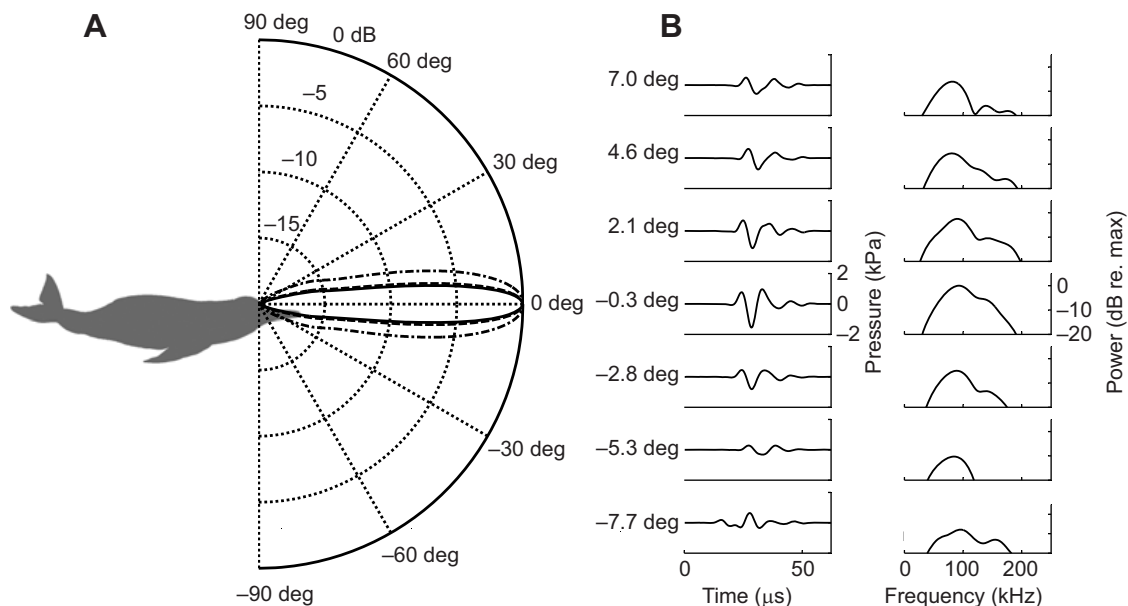

**Fig. 5. Composite vertical beam patterns for three range intervals and example of single click energy distribution.** (A) Polar plot showing estimated composite vertical beam patterns for single-lobed on-axis echolocation clicks recorded at ranges of 0–3 m (dotted and dashed line), 9–12 m (dashed line) and 18–21 m (solid line). (B) Waveforms and power spectra of a single representative echolocation click are shown by the signals recorded on each of the seven hydrophones along with estimated off-axis angles. All power spectra have been normalised relative to the peak frequency of the signal recorded closest to the acoustic axis. Note that the signal recorded on the bottommost hydrophone contains slightly more energy than the signal recorded on the hydrophone just above.

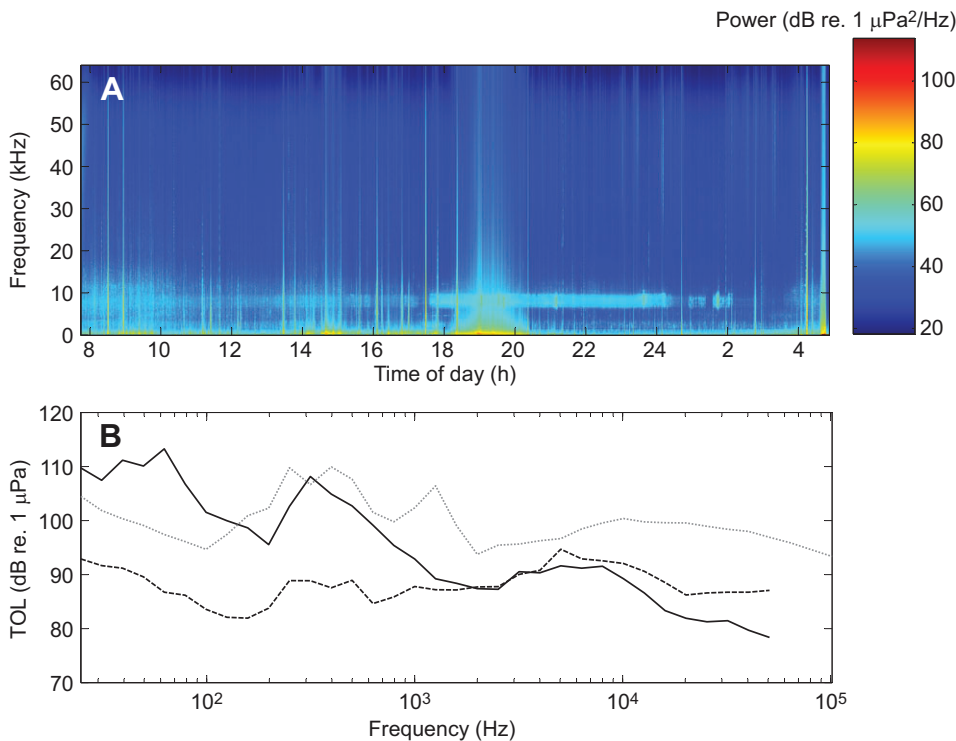

**Fig. 6. Ambient noise profiles.**

(A) Spectrogram showing the power spectral density as a function of time of day for the ambient noise recording from Mamirauá Sustainable Development Reserve. Intensity has been colour coded relative to the scale bar on the right. Sunset and sunrise occurred at 18:09 h and 05:57 h, respectively. (B) Mean energy distribution shown as third octave levels (TOLs) for the noise recording from Mamirauá Sustainable Development Reserve (solid line) and the recording at São Tomé (dashed line). Included for comparison is a 149 h and 47 min noise recording from Exmouth Gulf, Australia (22°18'37"S, 114°14'26.00"E) (grey dotted line) recorded with a sample rate of 288 kHz at 8 m depth (1.5 m above the bottom) with similar equipment as the Amazon recordings and analysed in an identical manner.

furthest target of interest plus a lag time, which may be species dependent (Madsen et al., 2013b) and also task dependent (Au, 1993; Wisniewska et al., 2012). For animals recorded at close range, a recording array may itself act as a relevant target, which can be inferred by animals keeping ICIs longer than TWTT to the array (Au and Herzing, 2003; Jensen et al., 2009). In this study, all on-axis clicks but one have ICIs longer than the TWTT at localisation ranges less than 17 m; below 10 m localisation range there also seems to be a reduction of ICIs longer than 50 ms compared with the remaining ICI distribution (Fig. 3B). This might indicate that botos close to the recording array have in fact detected the array and reduced their acoustic gaze to focus their attention on the array, or at least on other objects nearby. At ranges longer than 17 m, there is no evidence of range locking in the ICI, which can be explained either by a lack of attention to the array or by the animals failing to detect it at these longer ranges.

We hypothesised that botos click at high rates, based on the assumptions that search ranges will be short in shallow water environments, where a potential added effect of clutter and reverberation might create an acoustically complex environment where high update rates will benefit prey tracking and navigation. We find the mean ICI of 35 ms for the boto to be identical to the 35 ms found for the Ganges river dolphin (Jensen et al., 2013). In comparison, the typical mean ICIs of bottlenose dolphins in the wild may be two to four times longer (Wahlberg et al., 2011). Assuming a lag time of 20 ms (Morozov et al., 1972; Au, 1993), the mean ICIs found for botos correspond to an upper search distance averaging just 11 m (sound speed:  $1500 \text{ m s}^{-1}$ ), whereas the mean ICI of 63–120 ms measured for two species of bottlenose dolphin (Wahlberg et al., 2011) corresponds to upper search distances from 32–75 m, conforming with other studies investigating active biosonar ranges (Au et al., 2007; Simard et al., 2010). We therefore conclude that botos operate a short-range biosonar system, which may be reflected in their behaviour by their relatively slow swim speeds of usually less than  $1 \text{ m s}^{-1}$

(Best and da Silva, 1989). Botos are likely to encounter more objects per distance covered than toothed whales at sea, so a slow swim speed together with a high update rate probably reduces the risk of colliding with obstacles such as tree trunks and vegetation.

#### Low source levels in quiet, shallow waters

The boto's mean  $SL_{EFD}$  of 132 dB re.  $1 \mu\text{Pa}^2\text{s}$  and mean  $SL_{pp}$  of 190 dB re.  $1 \mu\text{Pa}$  are slightly higher than values reported for the Ganges river dolphin, which has a mean  $SL_{EFD}$  of 127 dB re.  $1 \mu\text{Pa}^2\text{s}$  and mean  $SL_{pp}$  of 183 dB re.  $1 \mu\text{Pa}$  (Jensen et al., 2013). The SL values for both river dolphin species are, however, low in comparison to the mean  $SL_{EFD}$  of 132–150 dB re.  $1 \mu\text{Pa}^2\text{s}$  and mean  $SL_{pp}$  of 199–212 dB re.  $1 \mu\text{Pa}$  reported for similar-sized marine toothed whales (Schotten et al., 2004; Wahlberg et al., 2011), thus supporting the hypothesis that the boto produces clicks at relatively low SL. Interestingly, the Irrawaddy dolphin (*Orcaella brevirostris*), which is also found in freshwater, echolocates with SL and ICI values very similar to the boto (Jensen et al., 2013), suggesting a general evolutionary selection for short-range biosonars in riverine toothed whales.

For toothed whales found in open waters, an increased SL will result in an increased detection distance as this increases the ratio of echo levels over ambient noise (Au and Turl, 1983; Au, 1993). However, in shallow waters, an increase in SL, although increasing target echo levels, also increases clutter and reverberation levels (Au and Turl, 1983), making operation of long-range sonar in shallow and complex habitats impractical (Jensen et al., 2013). The preliminary noise recordings made in this study indicate that ambient noise levels are low in comparison to what can be encountered at sea in shallow tropical marine waters (Fig. 6). This supports the notion that boto echolocation is indeed clutter limited, where high SLs do not facilitate detectability. Rather, it may be speculated that selection for low SLs has reduced the problem of range ambiguity in a complex auditory scene of many targets in shallow water.

### High frequencies despite low output levels

Changing the SL is not without consequences and may lead to alterations of the frequency content of emitted clicks as decreases in SL correlates with decreases in  $F_c$  (Moore and Pawloski, 1990; Au et al., 1995; Madsen et al., 2013a). The frequency content is important because directivity of a sonar beam follows the relationship between wavelength and effective aperture of the sound emitter, so for a constant melon size the DI will decrease with decreasing frequency (Au, 1993; Zimmer et al., 2005; Madsen and Wahlberg, 2007). For example, if a marine toothed whale switches from production of high SL clicks to clicks with SLs closer to that of a boto, the result may be a decrease in  $F_c$  by about an octave and hence a drop in DI by roughly 6 dB (Au et al., 1995). As initially hypothesised, the boto may therefore have an  $F_c$  higher than their SLs would predict in order to operate their biosonars at low SL without sacrificing directivity. If so, botos will maintain a narrow biosonar beam that will work to reduce effects of clutter and reverberation. A low SL and high  $F_c$  in combination will therefore provide botos with simpler auditory scenes to process and interpret.

In this study, we report a mean  $F_c$  and mean  $F_p$  of 101 and 95 kHz, respectively, which are well above most previously reported frequencies for boto echolocation clicks (Diercks et al., 1971; Nakasai and Takemura, 1975; Kamminga, 1979; Pilleri et al., 1979; Kamminga et al., 1993), but conform with the study by Penner and Murchison on a single boto in captivity (Penner and Murchison, 1970). Many of the previous studies may have suffered from equipment limitations, but even with adequate recording bandwidth, a lack of strict on-axis criteria may explain a large part of the remaining variation given how high frequencies are radiated in narrower beams than lower ones for the same aperture size (Au, 1993).

When comparing the mean  $F_c$  around 100 kHz with three published boto audiograms, it is surprising to find a best hearing sensitivity between 70 and 90 kHz, with a steep sensitivity cut-off above 100 kHz (Jacobs and Hall, 1972; Popov and Supin, 1990; Supin and Popov, 1993). This implies that botos only hear half of the sound energy in the returning echoes, which is at odds with the general match between best hearing frequency and the  $F_c$  in clicks of echolocating toothed whales (Au, 1993). This discrepancy may be real for botos, but in our opinion it is more likely that the low high-frequency cut-offs in the measured audiograms are related to the age of the measured animals or methodology. Data for Risso's dolphins show a poor overlap between click spectra and audiograms for old animals and a very good overlap for younger animals (Madsen et al., 2004; Nachtigall et al., 2005).

The frequency distribution reported here for the boto is slightly higher than for the similar-sized marine toothed whales chosen for comparison in this study (Schotten et al., 2004; Wahlberg et al., 2011). This corroborates our hypothesis that the boto operates its biosonar at relatively low SL, but at high  $F_c$  to maintain directivity. If habitat truly influences source parameters, then the prediction would be to find energy at similarly high frequencies for other freshwater-dwelling toothed whales as well. This seems to be the case for the Irrawaddy dolphin recorded in freshwater, where  $F_c$  and  $F_p$  have been found to be 95 and 101 kHz, respectively (Jensen et al., 2013). For baiji clicks, only  $F_p$  measures are published (Akamatsu et al., 1998), but  $F_p$  is by itself a far less-robust measure of the energy distribution in a click, compared with  $F_c$ , given how power spectra often show a bimodal energy distribution at least for some toothed whale species (Au et al., 1995; Au, 2004). We can therefore only speculate on whether or not the baiji produced clicks with similar frequency content as the boto. For the Ganges river dolphin (Fig. 7), however, the available data seem to contradict the

hypothesis of high frequencies being advantageous for biosonars operated in riverine habitats, as the Ganges river dolphin has a mean  $F_c$  of just 61 kHz (Jensen et al., 2013). Such frequency content is very low compared with the boto and similar-sized marine toothed whales, which have reported mean  $F_c$  values between 75 and 91 kHz (Schotten et al., 2004; Wahlberg et al., 2011). Interestingly, some evidence suggests that the unique maxillary bony crests of the Ganges river dolphin act to focus outgoing biosonar signals so that it may emit clicks with a DI of 22 dB, despite its small size and relatively low-frequency clicks (Jensen et al., 2013). While this is higher than what their biosonar frequency would suggest (Jensen et al., 2013), it is still lower than the DIs measured for most marine toothed whales (Koblitz et al., 2012).

Several evolutionary solutions to a shallow-water-adapted biosonar may exist; this is corroborated by results shown in Fig. 7, which displays an overview of echolocation signals for the extant river dolphins that have independently adapted to life in shallow waters during different ages of the Miocene epoch (Hamilton et al., 2001). The Ganges river dolphin, the baiji and the boto all produce very short broadband clicks, but the Ganges river dolphin clearly do so at lower frequencies than the others. Nevertheless, a recent study confirms that the Ganges river dolphin employs a short-range biosonar (Jensen et al., 2013), as we expect for all riverine toothed whales. In terms of habitat, the franciscana may be seen as an outlier amongst river dolphins as it inhabits estuarine and coastal waters. This might explain why it has evolved a narrow-band high-frequency signal, which is thought to be an adaptation against killer whale predation (Melcón et al., 2012; Kyhn et al., 2013).

### Dynamic beam patterns

The composite vertical beam patterns presented in this study have half-power beamwidths of approximately 10 deg and DIs in the order of 25–27 dB (Fig. 4 and Fig. 5A, Table 2), which falls right in the middle of previous measures for toothed whales (Koblitz et al., 2012), suggesting that high  $F_c$  at low SL serves to maintain high directivity despite low biosonar output levels in botos. In a study by Pilleri and co-workers, a single hydrophone recorded echolocation clicks from various angles to produce a composite beam pattern with an estimated half-power beamwidth of 29 deg at their reported peak frequency of 80 kHz and 28 deg at 100 kHz (Pilleri et al., 1979). Such half-power beamwidths are two to three times broader than found here (Table 2) and might be explained by a lack of directional control due to recording with a single hydrophone, in addition to the unnatural setting where the animal echolocates in a small concrete pool in which it may use even lower SL and hence  $F_c$ .

When DIs and equivalent piston radii are estimated from array data, a flat piston model is often fitted to how click levels taper off with increasing off-axis angle, but for some of the data recorded here, that criterion is not supported because of multiple amplitude peaks (Fig. 5B). All planar transducers have side lobes that may be in the order of –20 dB relative to the on-axis signal for toothed whale clicks (Au, 1993); however, for some clicks in this study, the additional lobe amplitudes were within –1 dB relative to the main lobe. Further studies using more sophisticated arrays are needed to confirm whether the unexpected finding of double-lobed beam patterns is truly biological in origin or is merely an artefact of the physical environment. A beam pattern having more than one main lobe has previously been reported for the Ganges river dolphin (Pilleri, 1979), but was not found in a more recent study on this species (Jensen et al., 2013), leaving the existence of double-lobed beam patterns controversial.



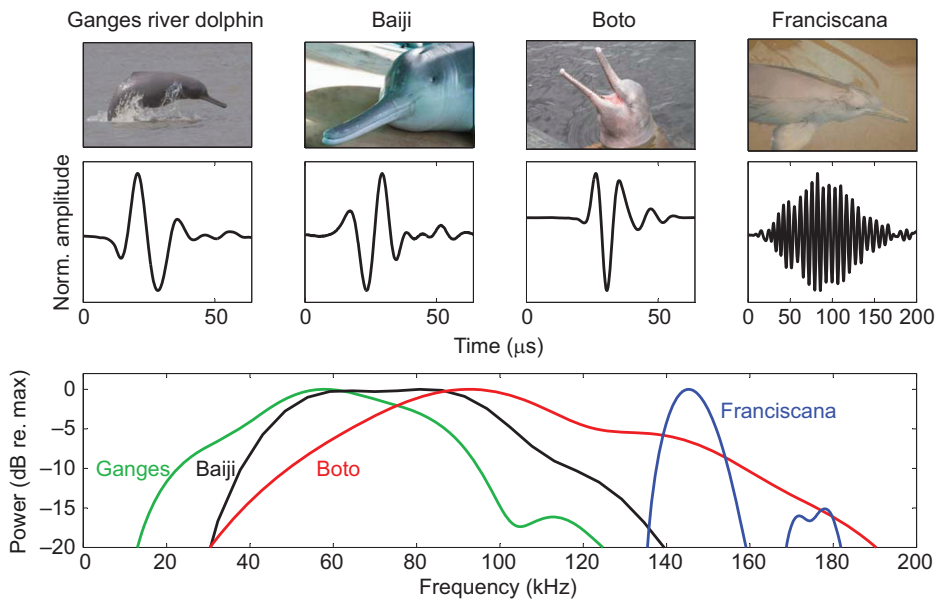

**Fig. 7. Overview of river dolphin echolocation signals.** Pictures, waveforms and power spectra of representative echolocation clicks from the Ganges river dolphin (*Platanista gangetica*), baiji (*Lipotes vexillifer*), boto (*Inia geoffrensis*) and franciscana (*Pontoporia blainvillei*). Power spectra are calculated for the example waveforms with FFT sizes of 1024 and sample rates of 500 kHz for the Ganges river dolphin, boto and franciscana and 5512.5 kHz for the baiji (signal was digitised from analogue recording). Note that the baiji click is from a data set, where this click had one of the lowest peak frequencies, suggesting a potential under-representation of high-frequency energy in the power spectrum shown compared with the mean for this species. Ganges river dolphin data: Jensen et al., 2013; baiji data: Akamatsu et al., 1998; boto data: present study; franciscana data: Melcón et al., 2012. Photo credits: Ganges river dolphin: E. and R. Mansur, WCS; baiji: Institute of Hydrobiology, Chinese Academy of Sciences; boto: Jorge Andrade; franciscana: Miguel Iniguez, WDC.

For the clicks with single-lobed beam patterns, it seems that greater localisation range corresponds with slightly narrower beamwidth, higher DI and larger EPR (Table 2). This fits well with the notion that higher SLs generally are measured at longer ranges (Fig. 3A) (Jensen et al., 2009) since higher SLs are to be predicted when the sound beam is more focused. Nevertheless, the tight relations between DI, SL and frequency makes it challenging to pinpoint the primary mode by which toothed whales make beam pattern adjustments. As shown in Fig. 4, botos are able to emit highly varying beam patterns, which is likely to be under acute control by these animals. Since the correlation between  $SL_{pp}$  and  $F_c$  was rather low in this study, with an  $R^2$  of just 0.11, then potential beam focusing might be achieved primarily through a fourth factor, namely conformation changes of the melon (Wisniewska et al., 2015). Melon dynamics might also relate to the sudden widening of the half-power beamwidth by about 50% when localisation range becomes less than 3 m. Such beam changes are comparable to the adjustments seen for porpoises initiating the buzz phase (Wisniewska et al., 2015) or Atlantic spotted dolphins focusing on a recording array (Jensen et al., 2015). It may be that botos dynamically change the beamwidths during close-up inspection of the array; however, at such short ranges, there is a high risk that animals are being recorded off-axis, which results in underestimated DIs, thus calling for caution when interpreting beam patterns. Assuming that the results are indeed a result of a variable beam, then it may be advantageous for botos to employ beam adjustments when navigating densely vegetated habitats, when moving between dense and open areas, and when tracking prey in a complex auditory scene. Studying the active control and dynamics of the conspicuous melon that botos possess in parallel with the source parameters of their echolocation clicks might be very fruitful for the understanding of toothed whale echolocation.

## Conclusion

Here, we have shown that Amazon river dolphins in the wild use a short-range biosonar in shallow water environments characterised by high levels of clutter and reverberation. Their biosonar system is characterised by a high frequency relative to the source level, resulting in a sonar beam of comparable directivity to those

achieved by marine delphinids despite operating at high repetition rates and low output levels. We argue that low-amplitude, highly directional biosonar systems are advantageous for toothed whales in riverine habitats since these parameters serve to simplify the auditory scene and facilitate target detection and discrimination in complex, cluttered environments. These findings suggest that habitat, in addition to size, may play an important role in the evolution of toothed whale echolocation.

## MATERIALS AND METHODS

### Study area and animals

Recordings were carried out in the vicinity of São Tomé, Amazon, Brazil (3°6'0"S, 60°29'40"W) on 15–18 October 2013, at the confluence between Rio Negro and Rio Solimões (3°8'0"S, 59°54'0"W) on the 20th of October 2013 and in the Mamirauá Sustainable Development Reserve, Amazon, Brazil (3°7'45"S, 64°47'20"W) on 22–27 October 2013. São Tomé is located on the Rio Negro, which carries black water rich in humic acids, whereas Rio Solimões, which also drains the Mamirauá Sustainable Development Reserve carries white water rich in sediment. Botos (*Inia geoffrensis* Blainville 1817) were recorded from small aluminium-hulled boats using a linear recording array deployed vertically after the boat had been driven slowly (1–2 knots) in the vicinity of animals some 10–100 m ahead of them. Sound speed was estimated to be 1512 m s<sup>-1</sup> using the Medwin equation (Medwin, 1975) on a mean measured water temperature of 31°C, an animal depth of 5 m and 62 ppm of salinity (Gibbs, 1972).

### Recording array

The linear recording array consisted of seven Neptune Sonar D/140 spherical hydrophones (Neptune Sonar Ltd., Kelk, UK) with a nominal sensitivity of  $-210$  dB re. 1 V  $\mu\text{Pa}^{-1}$ . All hydrophones were attached 60 cm apart through breakouts on the same 14 m, 16 wire cable of 8 mm diameter (Cortland Cable Company, Cortland, NY). Plexiglas cylinders (90×32 mm) filled with polyurethane encased each breakout with the hydrophone elements suspended 50 mm below the cylinders parallel to the cable. The array was attached to a buoy with the first hydrophone placed at 1 m depth below the surface. A 3 kg weight was attached at the end of the array 40 cm below the lowest hydrophone to ensure the array was kept as linear as possible. The hydrophone cable was connected to a custom-built 20 dB amplifier and filter box with high- (1 kHz, 1 pole) and low-pass (200 kHz, 4 pole) filters. From there, signals were relayed to an eight-channel analogue to digital converter (USB-6356, National Instruments, TX, USA), which sampled at 500 kHz at 16-bit resolution set by a custom-written recording



program (LabView, Metrotech, Denmark). Recordings were saved onto the hard drive of a laptop in WAVE file format with continuous recordings being divided into files of 30 s duration. Hydrophones were calibrated against a TC-4034 hydrophone (Teledyne RESON A/S, Slangerup, Denmark) and recordings were corrected for the hydrophone resonance frequency at 160 kHz to provide a flat frequency response ( $\pm 2$  dB) in the range of 2–180 kHz. The entire recording chain had a clipping level of 184 dB re. 1  $\mu$ Pa.

### On-axis click criteria

An initial screening was carried out in Adobe Audition 3 (Adobe Systems, CA, USA) to identify files containing echolocation clicks. Files were selected for further analysis if they contained clicks with received levels of  $>154$  dB re. 1  $\mu$ Pa (peak), i.e. 30 dB below clip level. This threshold was selected to standardise the screening process after initial exploratory analysis of random echolocation clicks. Recordings were analysed using custom-written scripts in Matlab 7.5 (MathWorks, Natick, MA, USA). To be accepted as an on-axis click, a click had to fulfil a set of criteria following Kyhn et al. (2010): (1) it had to be part of a click series of at least five consecutive clicks with received levels exceeding the 154 dB re. 1  $\mu$ Pa (peak) threshold and where received levels increased and then decreased within the click series. An unknown number of weaker on-axis clicks are therefore likely to have been ignored providing a lower bound on  $SL_{pp}$  in an  $x$  dB re. 1  $\mu$ Pa+20log(range) manner. If two or more click series overlapped in time then no on-axis clicks were selected. Click series overlap was readily identified in a given time window by inspecting ICI and received level differences between detected clicks. (2) Within a click series, the click with the highest received level was chosen, since this click was assumed most likely to have been on-axis within the horizontal plane. (3) The highest received level had to have been recorded on one of the five middle hydrophones, so that angle of incidence in the vertical plane could be estimated. (4) Click localisation must be robust i.e. with intersecting hyperbolas (see next section) and within confident localisation range determined by calibration measurements.

### Acoustic localisation

The time-of-arrival differences (TOADs) from when a click was received on each of the seven hydrophones were estimated via cross-correlation of the seven signals recorded for each click. For each hydrophone pair it was then possible to calculate a hyperbola that described the possible location of an animal given the TOAD. For a seven-hydrophone array, a total of six independent hyperbolas could be calculated, and from their crossing points the animal's location was estimated within two dimensions by applying a least-squares method following Wahlberg et al. (2001) and Madsen and Wahlberg (2007). Ranging calibration of the array was done in Aarhus Harbour, Denmark, from distances of 10 to 60 m with an HS70 hydrophone (Sonar Research and Development Ltd, Beverly, UK) acting as a transducer playing out two cycle pulses at 80 kHz as specified by a connected waveform generator (model 33220A, Agilent Technologies, CA, USA). The localisation calibration of the hydrophone array yielded a resulting error of less than 2 dB for the transmission loss estimate out to a range of 40 m, which is in line with accepted localisation errors in previous studies (Kyhn et al., 2009; Jensen et al., 2013).

### Source parameter estimation

Since recordings were done in shallow water, a 32-point Hann window centred on the peak of the signal envelope was applied to all signals to reduce the risk of reflections contributing substantially during parameter estimations. Signals were interpolated (Matlab *interp* function) by a factor of 10 in order to better estimate signal window length calculated as  $D$  duration defined by the  $-10$  dB end points relative to the peak of the amplitude envelopes (Madsen, 2005; Madsen and Wahlberg, 2007). Received levels were calculated as peak-to-peak (pp) sound pressures, RMS pressures within the  $D$  duration and as energy flux density (EFD) calculated for each click as the sum of the squared sound pressure values within the  $D$  duration (Madsen, 2005; Madsen and Wahlberg, 2007). Corresponding SLs (on-axis levels at 1 m reference distance) were then calculated by adding estimated

transmission loss to received level values. Transmission loss (dB re. 1 m) was estimated as the sum of spherical spreading (Urlick, 1983) and frequency-dependent absorption loss where the absorption estimate of  $0.0228$  dB  $m^{-1}$  was based on an assumed  $F_c$  of 90 kHz and a water temperature of 31°C.

Spectral parameters were estimated by first applying a 32-point Hann window centred on the peak of the signal envelope to the raw signal. The power spectrum was then estimated as the squared magnitude of a 320-point fast Fourier transform (FFT) applied to the signal, resulting in a linearly interpolated spectral resolution of 1.56 kHz.  $F_p$  was calculated as the frequency of highest value in the power spectrum whereas  $F_c$  was calculated as the frequency that divides a spectrum into two halves of equal energy on a linear scale. Bandwidth was parameterised in three different ways.  $BW_{-3dB}$  and  $BW_{-10dB}$  were given by the two points around  $F_p$  in the power spectrum where the signal had dropped  $-3$  or  $-10$  dB, respectively.  $BW_{RMS}$  was given by the standard deviation of a linear spectrum around  $F_c$ . The  $Q_{RMS}$  was calculated by dividing  $F_c$  by  $BW_{RMS}$ , providing a measure of how resonant a click was. ICI values were calculated as the time from on-axis click to the previous click in a click series.

### Beam pattern estimation

A composite beam pattern was estimated based on a model of a circular piston mounted in an infinite baffle which has previously been applied to describe radiation patterns of toothed whale echolocation clicks (Au, 1993; Beedholm and Møhl, 2006). First, the acoustic axis of each click was estimated based on the acoustic animal localisation and interpolation of received levels across all seven hydrophones. From the animal location, an off-axis angle could then be estimated to each individual hydrophone relative to the acoustic axis. Since the difference between off-axis angles at neighbouring hydrophones decreases with increasing distance, only on-axis clicks acoustically localised to less than 21 m were included in this part of the analysis. This stricter criterion was chosen because estimation of the angle of incidence to individual hydrophones is highly sensitive to localisation errors. For all on-axis clicks localised to less than 21 m, the received level at each of the seven hydrophones was back-calculated to estimate SL at 1 m and then normalised relative to the signal with highest back-calculated amplitude. Off-axis angles, together with normalised apparent SLs, were then used to estimate a composite vertical beam pattern through a single parametric fit in which piston diameters from 1 to 20 cm were tested in 0.01 cm increments (Kyhn et al., 2010). For each piston diameter tested, a goodness of fit was calculated as the sum of squared error between observed and predicted SLs. A best composite beam pattern was selected on the basis of the piston size that minimised the sum of squared error. Afterwards, a bootstrapping procedure was carried out to estimate confidence intervals of the composite beam pattern (Jensen et al., 2015): for each bootstrap,  $N$  clicks were drawn with replacement from the original pool of  $N$  on-axis clicks. The beam pattern was fitted as described above, resulting in a bootstrap estimate of the piston radius. A total of 2000 bootstrap estimates was created and the 95% bootstrap confidence intervals calculated as the 2.5th and 97.5th percentile of the resulting bootstrap distribution of estimated piston radius. The symmetric half-power beamwidth was then calculated for the estimated composite beam pattern and transmission DI was approximated as  $20\log(ka)$ , where  $k$  is the wavenumber defined as  $2\pi/\lambda$  and  $a$  is the piston radius (Urlick, 1983; Zimmer et al., 2005).

### Ambient noise recording

Ambient noise levels were recorded 4 km north-east of São Tomé (3°5'0"S, 60°28'0"W) on 16 October and in a minor tributary in Mamirauá Sustainable Development Reserve (3°6'0"S, 64°47'55"W) on 26 October. Botos were observed daily at both locations. A single SUDAR (Ocean Instruments, New Zealand) was deployed from a buoy at São Tomé and a few metres from a river bank at Mamirauá where the SUDAR recorded at a depth of 2 m for 32 h and 43 min and 21 h and 27 min, respectively. The SUDAR recorded with a sampling rate of 128 kHz and a clipping level of 169 dB re. 1  $\mu$ Pa. Third octave levels (TOLs) were calculated for the entire duration of both recordings.

### Acknowledgements

This study was part of Projeto Boto, a cooperative agreement between the National Amazon Research Institute (INPA/MCTI) and the Mamirauá Sustainable Development Institute (MSDI-OS/MCTI). We wish to express our sincere gratitude to field assistants and locals in the Amazon for their dedicated help and support in making the logistics and field work a seamless operation. Thanks to Renata S. Sousa-Lima for facilitating field work and Kristian Beedholm for assistance with Matlab scripts and figures. Thanks to Mariana L. Melcón and Tom Akamatsu for most generously making their own data available for the final figure. Field work was carried out under permission SISBio-13462-5.

### Competing interests

The authors declare no competing or financial interests.

### Author contributions

M.L., M.d.F. and P.T.M. designed experimental procedures. M.d.F. and P.T.M. built and calibrated the recording array. M.L., M.d.F., V.M.F.d.S. and P.T.M. carried out field work. M.L., F.H.J., M.d.F. and P.T.M. developed analytical methods. M.L., F.H.J., M.d.F., V.M.F.d.S. and P.T.M. drafted the manuscript.

### Funding

Field work was funded by Danish National Research Council grants to P.T.M., Associação Amigos do Peixe Boi da Amazônia (AMPA) and Petrobras Ambiental grants to V.M.F.d.S., Augustinus Fonden grants to M.L. and a travelling fellowship awarded to M.d.F. by *Journal of Experimental Biology*. M.L. was funded by a PhD stipend from the Faculty of Science and Technology, Aarhus University, and National Research Council grants to P.T.M. F.H.J. was funded by a Carlsberg Foundation travel grant.

### References

- Akamatsu, T., Wang, D., Nakamura, K. and Wang, K. (1998). Echolocation range of captive and free-ranging baiji (*Lipotes vexillifer*), finless porpoise (*Neophocaena phocaenoides*), and bottlenose dolphin (*Tursiops truncatus*). *J. Acoust. Soc. Am.* **104**, 2511-2516.
- Au, W. W. L. (1992). Application of the reverberation-limited form of the sonar equation to dolphin echolocation. *J. Acoust. Soc. Am.* **92**, 1822-1826.
- Au, W. W. L. (1993). *The Sonar of Dolphins*. New York: Springer-Verlag.
- Au, W. W. L. (2004). Echolocation signals of wild dolphins. *Acoust. Phys.* **50**, 454-462.
- Au, W. W. L. and Herzog, D. L. (2003). Echolocation signals of wild Atlantic spotted dolphin (*Stenella frontalis*). *J. Acoust. Soc. Am.* **113**, 598-604.
- Au, W. W. L. and Turl, C. W. (1983). Target detection in reverberation by an echolocating Atlantic bottlenose dolphin (*Tursiops truncatus*). *J. Acoust. Soc. Am.* **73**, 1676-1681.
- Au, W. W. L., Floyd, R. W., Penner, R. H. and Murchison, A. E. (1974). Measurement of echolocation signals of the Atlantic bottlenose dolphin, *Tursiops truncatus* Montagu, in open waters. *J. Acoust. Soc. Am.* **56**, 1280-1290.
- Au, W. W. L., Pawloski, J. L., Nachtigall, P. E., Blonz, M. and Gisner, R. C. (1995). Echolocation signals and transmission beam pattern of a false killer whale (*Pseudorca crassidens*). *J. Acoust. Soc. Am.* **98**, 51-59.
- Au, W. W. L., Benoit-Bird, K. J. and Kastelein, R. A. (2007). Modeling the detection range of fish by echolocating bottlenose dolphins and harbor porpoises. *J. Acoust. Soc. Am.* **121**, 3954-3962.
- Aytekin, M., Mao, B. and Moss, C. F. (2010). Spatial perception and adaptive sonar behavior. *J. Acoust. Soc. Am.* **128**, 3788-3798.
- Beedholm, K. and Møhl, B. (2006). Directionality of sperm whale sonar clicks and its relation to piston radiation theory. *J. Acoust. Soc. Am.* **119**, EL14-EL19.
- Best, R. C. and da Silva, V. M. F. (1989). Amazon river dolphin, boto *Inia geoffrensis* (de Blainville, 1817) pp. 1-23. In *Handbook of Marine Mammals*, Vol. 4 (ed. S. H. Ridgway and R. J. Harrison). London: Academic Press.
- Diercks, K. J., Trochta, R. T., Greenlaw, C. F. and Evans, W. E. (1971). Recording and analysis of dolphin echolocation signals. *J. Acoust. Soc. Am.* **49**, 1729-1732.
- Gibbs, R. J. (1972). Water chemistry of the Amazon River. *Geochim. Cosmochim. Acta* **36**, 1061-1066.
- Griffin, D. R. (1958). *Listening in the Dark*. New Haven: Yale University Press.
- Hamilton, H., Caballero, S., Collins, A. G. and Brownell, R. L. (2001). Evolution of river dolphins. *Proc. R. Soc. B. Biol. Sci.* **268**, 549-556.
- Houser, D., Martin, S. W., Bauer, E. J., Phillips, M., Herrin, T., Cross, M., Vidal, A. and Moore, P. W. (2005). Echolocation characteristics of free-swimming bottlenose dolphins during object detection and identification. *J. Acoust. Soc. Am.* **117**, 2308-2317.
- Jacobs, D. W. and Hall, J. D. (1972). Auditory thresholds of a fresh water dolphin, *Inia geoffrensis* Blainville. *J. Acoust. Soc. Am.* **51**, 530-533.
- Jefferson, T. A., Webber, M. A. and Pitman, R. L. (2008). *Marine Mammals of the World: A Comprehensive Guide to Their Identification*. London: Academic Press.
- Jensen, F. H., Bejder, L., Wahlberg, M. and Madsen, P. T. (2009). Biosonar adjustments to target range of echolocating bottlenose dolphins (*Tursiops sp.*) in the wild. *J. Exp. Biol.* **212**, 1078-1086.
- Jensen, F. H., Rocco, A., Mansur, R. M., Smith, B. D., Janik, V. M. and Madsen, P. T. (2013). Clicking in shallow rivers: short-range echolocation of Irrawaddy and Ganges river dolphins in a shallow, acoustically complex habitat. *PLoS ONE* **8**, e59284.
- Jensen, F. H., Wahlberg, M., Beedholm, K., Johnson, M., de Soto, N. A. and Madsen, P. T. (2015). Single-click beam patterns suggest dynamic changes to the field of view of echolocating Atlantic spotted dolphins (*Stenella frontalis*) in the wild. *J. Exp. Biol.* **218**, 1314-1324.
- Kamminga, C. (1979). Remarks on dominant frequencies of cetacean sonar. *Aquat. Mamm.* **7**, 93-100.
- Kamminga, C., Van Hove, M. T., Englesma, F. J. and Terry, R. P. (1993). Investigations on Cetacean Sonar X: a comparative analysis of underwater echolocation clicks of *Inia* spp. and *Sotalia* spp. *Aquat. Mamm.* **19**, 31-43.
- Koblitz, J. C., Wahlberg, M., Stilz, P., Madsen, P. T., Beedholm, K. and Schnitzler, H.-U. (2012). Asymmetry and dynamics of a narrow sonar beam in an echolocating harbor porpoise. *J. Acoust. Soc. Am.* **131**, 2315-2324.
- Kyhn, L. A., Tougaard, J., Jensen, F., Wahlberg, M., Stone, G., Yoshinaga, A., Beedholm, K. and Madsen, P. T. (2009). Feeding at a high pitch: Source parameters of narrow band, high-frequency clicks from echolocating off-shore hourglass dolphins and coastal Hector's dolphins. *J. Acoust. Soc. Am.* **125**, 1783-1791.
- Kyhn, L. A., Jensen, F. H., Beedholm, K., Tougaard, J., Hansen, M. and Madsen, P. T. (2010). Echolocation in sympatric Peale's dolphins (*Lagenorhynchus australis*) and Commerson's dolphins (*Cephalorhynchus commersonii*) producing narrow-band high-frequency clicks. *J. Exp. Biol.* **213**, 1940-1949.
- Kyhn, L. A., Tougaard, J., Beedholm, K., Jensen, F. H., Ashe, E., Williams, R. and Madsen, P. T. (2013). Clicking in a killer whale habitat: narrow-band, high-frequency biosonar clicks of harbour porpoise (*Phocoena phocoena*) and Dall's porpoise (*Phocoenoides dalli*). *PLoS ONE* **8**, e63763.
- Madsen, P. T. (2005). Marine mammals and noise: Problems with root mean square sound pressure levels for transients. *J. Acoust. Soc. Am.* **117**, 3952-3957.
- Madsen, P. T. and Surlykke, A. (2013). Functional convergence in bat and toothed whale biosonars. *Physiology* **28**, 276-283.
- Madsen, P. T. and Surlykke, A. (2014). Echolocation in air and water. In *Biosonar*, Vol. 51 (ed. A. Surlykke P. E. Nachtigall R. R. Fay and A. N. Popper), pp. 257-304. New York: Springer.
- Madsen, P. T. and Wahlberg, M. (2007). Recording and quantification of ultrasonic echolocation clicks from free-ranging toothed whales. *Deep Sea Res. Part 1 Oceanogr. Res. Pap.* **54**, 1421-1444.
- Madsen, P. T., Kerr, I. and Payne, R. (2004). Echolocation clicks of two free-ranging, oceanic delphinids with different food preferences: false killer whales *Pseudorca crassidens* and Risso's dolphins *Grampus griseus*. *J. Exp. Biol.* **207**, 1811-1823.
- Madsen, P. T., Lammers, M., Wisniewska, D. and Beedholm, K. (2013a). Nasal sound production in echolocating delphinids (*Tursiops truncatus* and *Pseudorca crassidens*) is dynamic, but unilateral: clicking on the right side and whistling on the left side. *J. Exp. Biol.* **216**, 4091-4102.
- Madsen, P. T., de Soto, N. A., Arranz, P. and Johnson, M. (2013b). Echolocation in Blainville's beaked whales (*Mesoplodon densirostris*). *J. Comp. Physiol. A* **199**, 451-469.
- Martin, A. R. and da Silva, V. M. F. (2004). River dolphins and flooded forest: seasonal habitat use and sexual segregation of botos (*Inia geoffrensis*) in an extreme cetacean environment. *J. Zool.* **263**, 295-305.
- Medwin, H. (1975). Speed of sound in water: a simple equation for realistic parameters. *J. Acoust. Soc. Am.* **58**, 1318.
- Melcón, M. L., Failla, M. and Iñiguez, M. A. (2012). Echolocation behavior of franciscana dolphins (*Pontoporia blainvillei*) in the wild. *J. Acoust. Soc. Am.* **131**, EL448-EL453.
- Møhl, B., Wahlberg, M., Madsen, P. T., Heerfordt, A. and Lund, A. (2003). The monopulsed nature of sperm whale clicks. *J. Acoust. Soc. Am.* **114**, 1143.
- Moore, P. W. B. and Pawloski, D. A. (1990). Investigations on the control of echolocation pulses in the dolphin (*Tursiops truncatus*). In *Sensory Abilities of Cetaceans* (ed. J. A. Thomas and R. A. Kastelein), pp. 305-316. New York: Springer US.
- Morozov, V. P., Akopian, A. I., Burdin, V. I., Zaitseva, K. A. and Sokovykh, Y. A. (1972). Tracking frequency of the location signals of dolphins as a function of distance to the target. *Biofizika* **17**, 145-151.
- Moss, C. F. and Surlykke, A. (2001). Auditory scene analysis by echolocation in bats. *J. Acoust. Soc. Am.* **110**, 2207.
- Nachtigall, P. E., Yuen, M. M. L., Mooney, T. A. and Taylor, K. A. (2005). Hearing measurements from a stranded infant Risso's dolphin, *Grampus griseus*. *J. Exp. Biol.* **208**, 4181-4188.
- Nakasai, K. and Takemura, A. (1975). Studies on the underwater sound-VI on the underwater calls of fresh water dolphins in South America. *Bull. Fac. Fish. Nagasaki Univ.* **40**, 7-13.
- Neuweiler, G. (1989). Foraging ecology and audition in echolocating bats. *Trends Ecol.* **4**, 160-166.

- Norris, K. S., Harvey, G. W., Burzell, L. A. and Kartha, T. D. K. (1972). Sound production in the freshwater porpoises *Sotalia cf. fluviatilis* (Gervais and Deville) and *Inia geoffrensis* (Blainville), in the Rio Negro, Brazil. *Invest. Cetacea* **4**, 251-262.
- Penner, R. H. and Murchison, A. E. (1970). *Experimentally Demonstrated Echolocation in the Amazon River Porpoise, Inia Geoffrensis* (Blainville). San Diego, CA: Naval Undersea Research and Development Center, Technical Publication 187.
- Pilleri, G. (1979). The blind Indus dolphin, *Platanista indi*. *Endeavour* **3**, 48-56.
- Pilleri, G., Zbinden, K. and Kraus, C. (1979). The sonar field of *Inia geoffrensis*. *Invest. Cetacea* **10**, 157-176.
- Popov, V. and Supin, A. (1990). Electrophysiological studies of hearing in some cetaceans and a manatee. In *Sensory Abilities of Cetaceans* (ed. J. A. Thomas and R. A. Kastelein), pp. 405-415. New York: Plenum Press.
- Schnitzler, H.-U. and Kalko, E. K. V. (2001). Echolocation by insect-eating bats. *Bioscience* **51**, 557-569.
- Schotten, M., Au, W. W. L., Lammers, M. O. and Aubauer, R. (2004). Echolocation recordings and localization of wild spinner dolphins (*Stenella longirostris*) and pantropical spotted dolphins (*S. attenuata*) using a four-hydrophone array. In *Echolocation in Bats and Dolphins* (ed. J. A. Thomas C. F. Moss and M. Vater), pp. 393-400. Chicago: University of Chicago Press.
- Simard, P., Hibbard, A. L., McCallister, K. A., Frankel, A. S., Zeddies, D. G., Sisson, G. M., Gowans, S., Forsys, E. A. and Mann, D. A. (2010). Depth dependent variation of the echolocation pulse rate of bottlenose dolphins (*Tursiops truncatus*). *J. Acoust. Soc. Am.* **127**, 568-578.
- Supin, A. Y. and Popov, V. V. (1993). Direction-dependent spectral sensitivity and interaural spectral difference in a dolphin: evoked potential study. *J. Acoust. Soc. Am.* **93**, 3490-3495.
- Surlykke, A., Ghose, K. and Moss, C. F. (2009). Acoustic scanning of natural scenes by echolocation in the big brown bat, *Eptesicus fuscus*. *J. Exp. Biol.* **212**, 1011-1020.
- Turl, C. W., Skaar, D. J. and Au, W. W. L. (1991). The echolocation ability of the beluga (*Delphinapterus leucas*) to detect targets in clutter. *J. Acoust. Soc. Am.* **89**, 896-901.
- Urick, R. J. (1983). *Principles of Underwater Sound*. Los Altos, California: Peninsula Publishing.
- Wahlberg, M., Møhl, B. and Teglberg Madsen, P. (2001). Estimating source position accuracy of a large-aperture hydrophone array for bioacoustics. *J. Acoust. Soc. Am.* **109**, 397-406.
- Wahlberg, M., Jensen, F. H., Aguilar Soto, N., Beedholm, K., Bejder, L., Oliveira, C., Rasmussen, M., Simon, M., Villadsgaard, A. and Madsen, P. T. (2011). Source parameters of echolocation clicks from wild bottlenose dolphins (*Tursiops aduncus* and *Tursiops truncatus*). *J. Acoust. Soc. Am.* **130**, 2263-2274.
- Wisniewska, D. M., Johnson, M., Beedholm, K., Wahlberg, M. and Madsen, P. T. (2012). Acoustic gaze adjustments during active target selection in echolocating porpoises. *J. Exp. Biol.* **215**, 4358-4373.
- Wisniewska, D. M., Ratcliffe, J. M., Beedholm, K., Christensen, C. B., Johnson, M., Koblitz, J. C., Wahlberg, M. and Madsen, P. T. (2015). Range-dependent flexibility in the acoustic field of view of echolocating porpoises (*Phocoena phocoena*). *eLife* **4**, e05651.
- Zimmer, W. M. X., Johnson, M. P., Madsen, P. T. and Tyack, P. L. (2005). Echolocation clicks of free-ranging Cuvier's beaked whales (*Ziphius cavirostris*). *J. Acoust. Soc. Am.* **117**, 3919-3927.
